# Supplementary material for: An improved theory of the electric conductance of ionic solutions based on the concept of the ion-atmosphere's smaller-ion shell
Source: Royal Society of Chemistry journal article supplement (doi:10.1039/c8cp06000b), 2018-01-01
Supplement: c8cp06000b1.pdf [file c8cp06000b1.pdf]

**Supplementary Information**

**An improved theory of the electric conductance of ionic solutions based on the  
concept of the ion-atmosphere's smaller-ion shell**

Dan Fraenkel\*

*Eltron Research & Development LLC, 4600 Nautilus Court South, Boulder, Colorado 80301-  
3241, USA*

Table S1 lists the co-ion ISP values –  $b_+$  and  $b_-$  – of the ions of the electrolytes of this study, along with the corresponding limiting ionic equivalent conductivity values ( $\lambda_i^0$ 's;  $i = +, -$ ).

**Table S1** Ion size and limiting ionic equivalent conductivity<sup>a</sup>

| <b>Cation</b>          | $b_+$ | $\lambda_+^0$ | <b>Anion</b>                           | $b_-$ | $\lambda_-^0$ |
|------------------------|-------|---------------|----------------------------------------|-------|---------------|
| <b>H<sup>+</sup></b>   | 1.16  | 349.65        | <b>Cl<sup>-</sup></b>                  | 3.62  | 76.31         |
| <b>Li<sup>+</sup></b>  | 1.36  | 38.66         | <b>Br<sup>-</sup></b>                  | 3.92  | 78.1          |
| <b>Na<sup>+</sup></b>  | 1.94  | 50.08         | <b>I<sup>-</sup></b>                   | 4.40  | 76.8          |
| <b>K<sup>+</sup></b>   | 2.66  | 73.48         | <b>ClO<sub>4</sub><sup>-</sup></b>     | 4.80  | 67.3          |
| <b>Tl<sup>+</sup></b>  | 2.94  | 74.7          | <b>SO<sub>4</sub><sup>2-</sup></b>     | 4.60  | 80.0          |
| <b>Mg<sup>2+</sup></b> | 2.12  | 53.0          | <b>Fe(CN)<sub>6</sub><sup>3-</sup></b> | 5.20  | 100.9         |
| <b>Ca<sup>2+</sup></b> | 2.26  | 59.47         | <b>Fe(CN)<sub>6</sub><sup>4-</sup></b> | 5.60  | 110.4         |
| <b>Cu<sup>2+</sup></b> | 2.3   | 53.6          |                                        |       |               |
| <b>Sr<sup>2+</sup></b> | 2.24  | 59.4          |                                        |       |               |
| <b>Zn<sup>2+</sup></b> | 2.3   | 52.8          |                                        |       |               |
| <b>La<sup>3+</sup></b> | 2.12  | 69.7          |                                        |       |               |

<sup>a</sup> in water at 25 °C;  $b$ 's are in Å;  $\lambda_i^0$ 's in S cm<sup>2</sup> g-eq, as those of  $(1/z_+)C^{(z_+)+}$  or  $(1/z_-)A^{(z_-)-}$ ;  $b$  data are from Refs. 18 (salts) and 22 (acids), and  $\lambda_i^0$  data, from Ref. 23, 5-95–5-97.

Table S2 lists values of  $\omega^\ddagger$  computed at different concentrations ( $c$ , mol/lit), for six representative electrolytes, all in water at 25 °C, along with the limiting values of  $I$  and  $\kappa a$  for the conductivity model, as used in the current work.

**Table S2** Change of  $\omega^\ddagger$  as a function of concentration and the assumed maximum  $c$ -range (and maximum  $\kappa a$ ,  $a$  in Å) of applicability of DHO–SiS, for different aqueous electrolytes at 25 °C

| $c$ , mol/liter    | HCl    | LiCl   | KCl     | SrCl <sub>2</sub> | ZnSO <sub>4</sub> | K <sub>3</sub> Fe(CN) <sub>6</sub> |
|--------------------|--------|--------|---------|-------------------|-------------------|------------------------------------|
| 0.001              | 1.0175 | 1.0030 | 1.00001 | 1.00057           | 1.0033            | 1.00201                            |
| 0.005              | 1.0392 | 1.0067 | 1.00002 | 1.00127           | 1.0074            | 1.00449                            |
| 0.01               | 1.0554 | 1.0095 | 1.00003 | 1.00180           | 1.0105            | 1.00635                            |
| 0.05               | 1.1239 | 1.0213 | 1.00006 | 1.00402           | 1.0234            | 1.01419                            |
| 0.1                | 1.1752 | 1.0301 | 1.00008 | 1.00569           | 1.0332            | 1.02007                            |
| 0.2                | 1.2478 | 1.0426 | 1.00012 | 1.00805           | 1.0469            | 1.02839                            |
| $c_{max}$          | 0.105  | 0.105  | 0.101   | 0.0343            | 0.022             | 0.0187                             |
| $(\kappa a)_{max}$ | 0.385  | 0.385  | 0.358   | 0.371             | 0.266             | 0.433                              |

Figures S1 to S6 are supplementary Figures, as discussed in the main text.

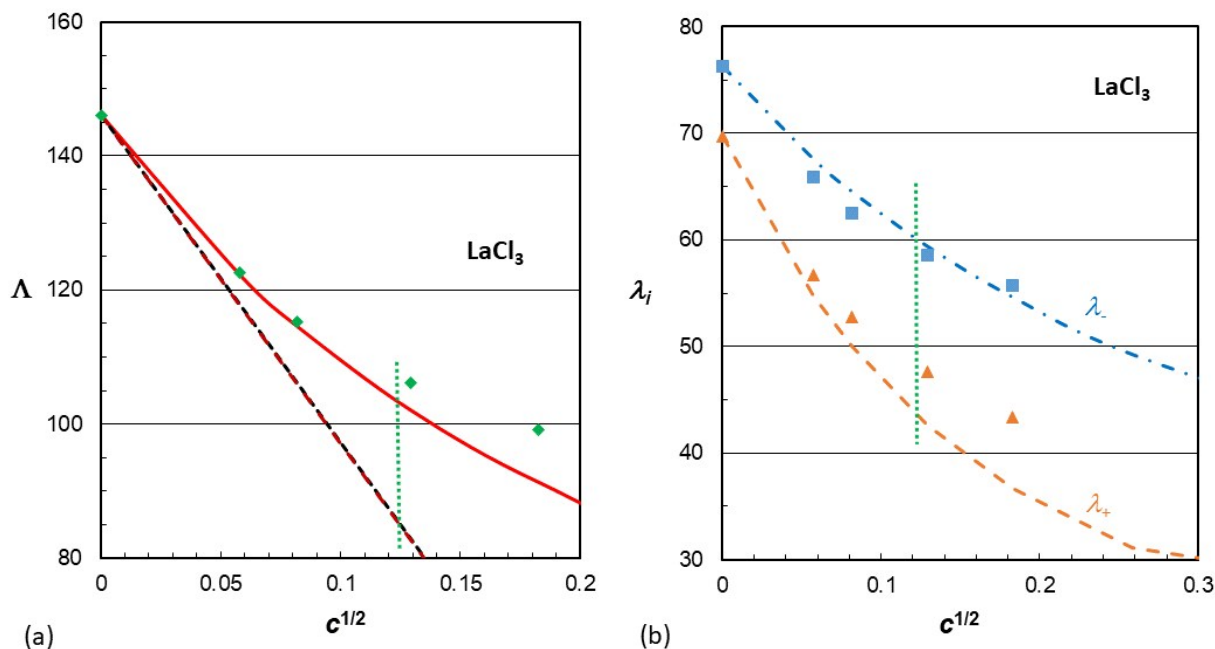

Fig. S1 Equivalent conductivities ( $\Lambda$ ,  $\lambda_i$ ) of  $\text{LaCl}_3$  and its ions in  $\text{H}_2\text{O}$  at 25 °C, as functions of concentration,  $c$ , as mole electrolyte solute per liter solution (M); vertical bars (dotted lines) indicate the expected limit of the DHO model validity (Table 2): (a) Comparison between the proposed DHO–SiS theory, “Aclc” (solid line); the DHO–SiS limiting law “ALL” (hyphenated line), and the “DHOLL” limiting law, eqn (1) (broken line), here the two lines merge with each other; and experimental data (full diamond symbols). (b) Theory–experiment comparison of the single-ion equivalent conductivity of  $\text{Na}^+$  ( $\lambda_+$ ) and of  $\text{Cl}^-$  ( $\lambda_-$ ); broken line ( $\lambda_+$ ) and broken-dotted line ( $\lambda_-$ ) are calculated, symbols (full triangles for  $\lambda_+$ , full squares for  $\lambda_-$ ) are data based on measured  $\Lambda$  and  $t_i$ . Experimental data are in references listed in Table 3.

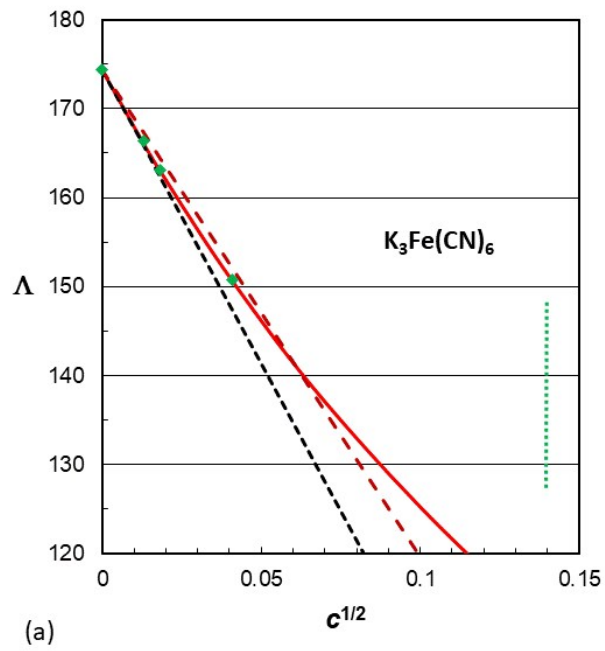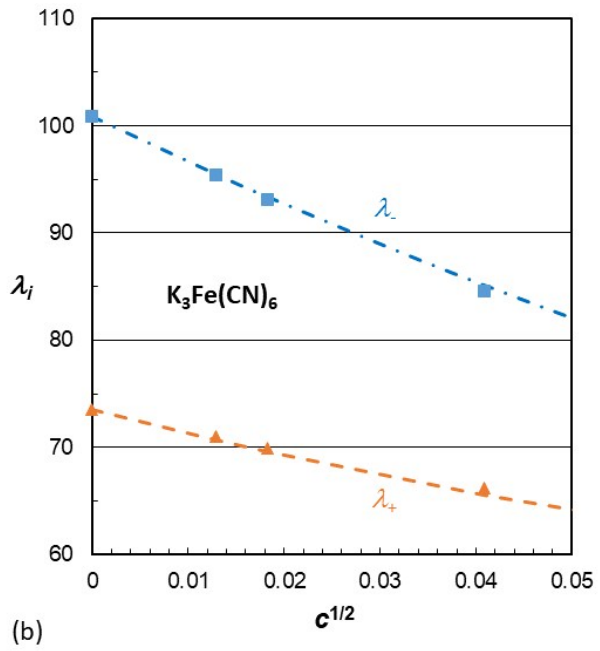

Fig. S2 As Fig. S1, but for  $K_3Fe(CN)_6$ .

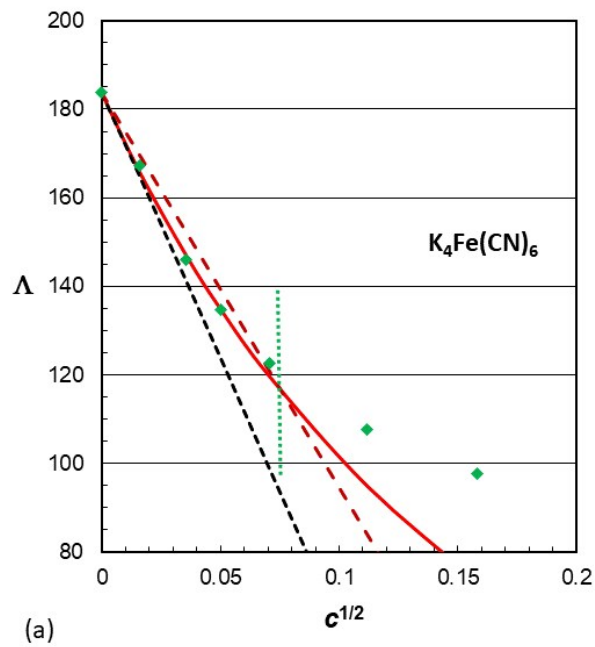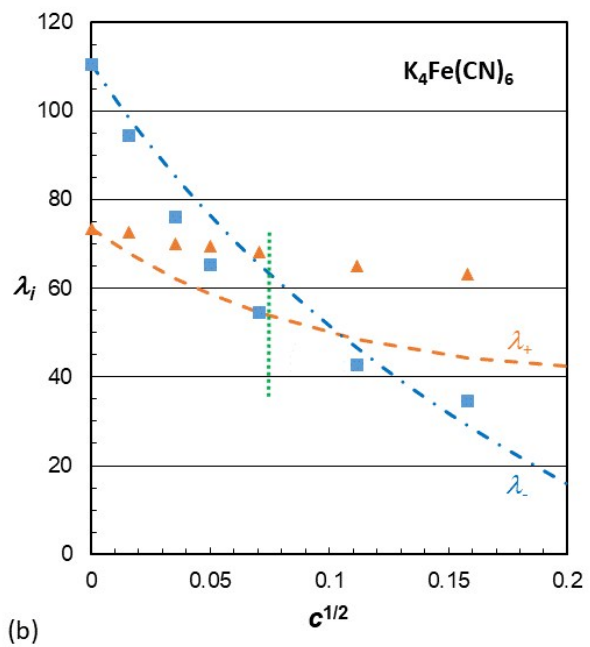

Fig. S3 As Fig. S1, but for  $K_4Fe(CN)_6$ .

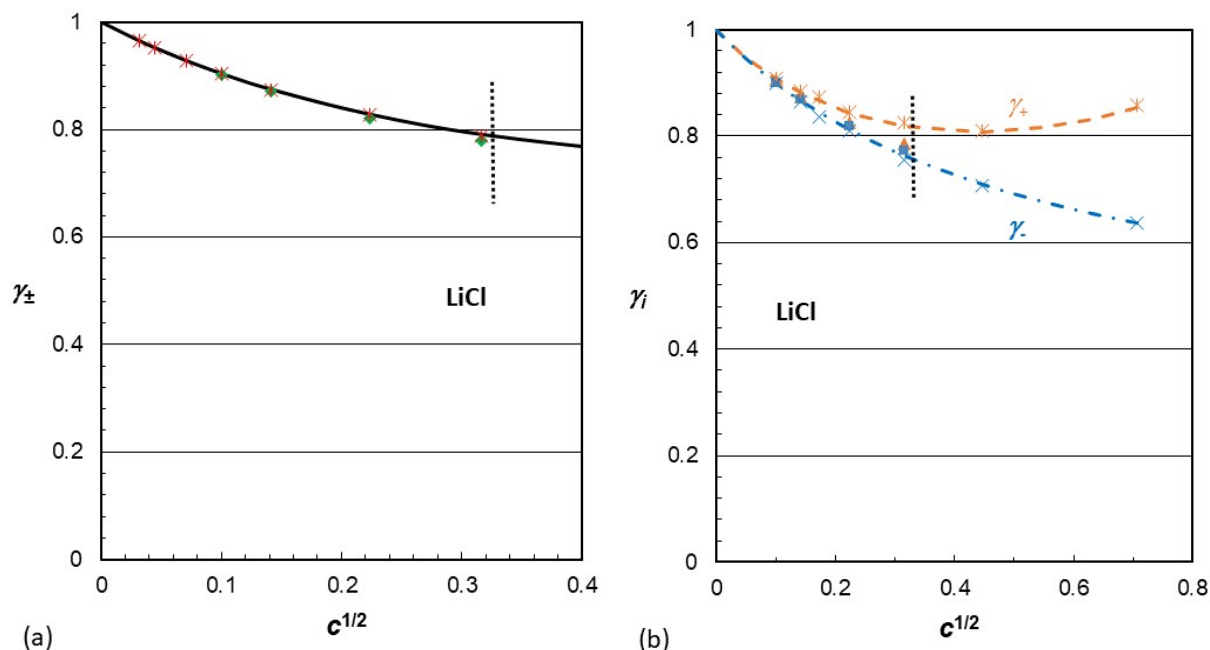

Fig. S4 Activity coefficients of LiCl in H<sub>2</sub>O at 25 °C; vertical bars (dotted lines) indicate the expected limit of the DHO model validity (Table 2). (a)  $\gamma_{\pm}$  vs.  $c^{1/2}$ ; the line is the theoretical function computed from the DH-SiS expression using the ISPs of Tables S1 and 3, the star symbols are experimental values (Table 3), and the full diamond symbols are values calculated from conductivity, eqn (16) – (18). (b)  $\gamma_i$  vs.  $c^{1/2}$ ,  $i = +, -$ ; the lines are the theoretical functions (of DH-SiS); the dashed line is of  $\gamma_+$ , the dashed-dotted line is of  $\gamma_-$ ; the full triangle and full square symbols are  $\gamma_i$  values calculated from conductivity, for  $\text{Li}^+$  and  $\text{Cl}^-$ , respectively; and the \* and  $\times$  symbols are, respectively, experimental data of Vera's group, Ref. 27.

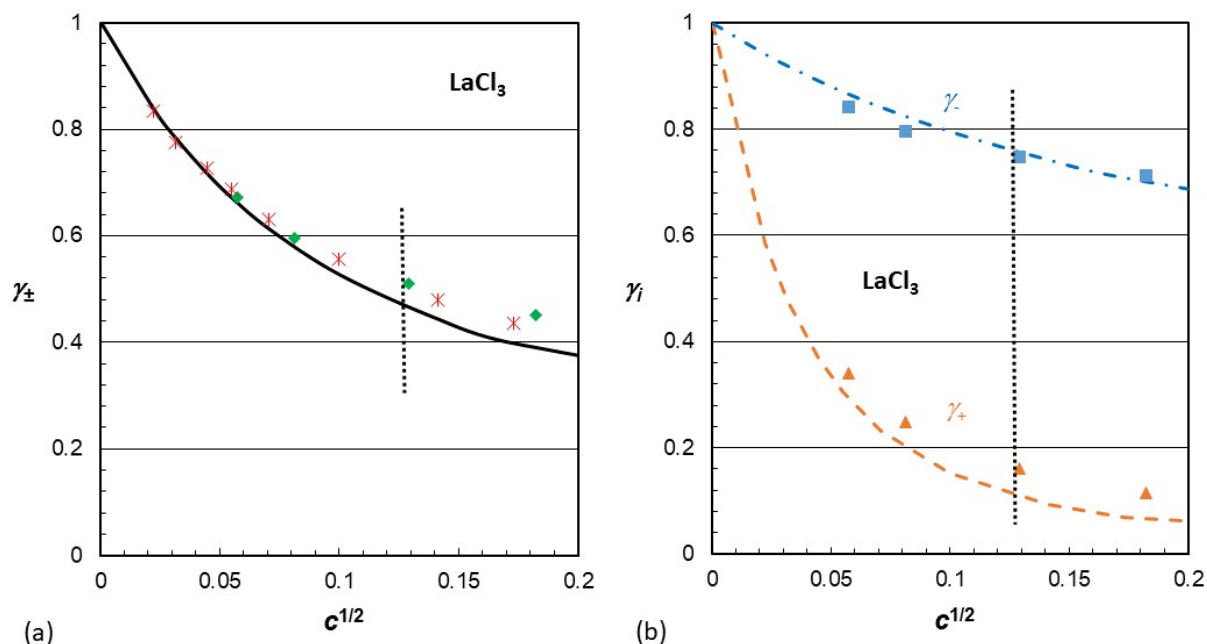

Fig. S5 Activity coefficients of LaCl<sub>3</sub> in H<sub>2</sub>O at 25 °C; vertical bars (dotted lines) indicate the expected limit of the DHO model validity (Table 2). (a)  $\gamma_{\pm}$  vs.  $c^{1/2}$ ; the line is the theoretical function computed from the DH-SiS expression using the ISPs of Tables S1 and 3, the star symbols are experimental values (Table 3), and the full diamond symbols are values calculated from conductivity, eqn (16) – (18). (b)  $\gamma_i$  vs.  $c^{1/2}$ ,  $i = +, -$ ; the dashed and dashed-dotted lines are the theoretical functions (of DH-SiS) for  $\gamma_+$  and  $\gamma_-$ , respectively; and the full triangle and full square symbols are, respectively, values calculated from conductivity.

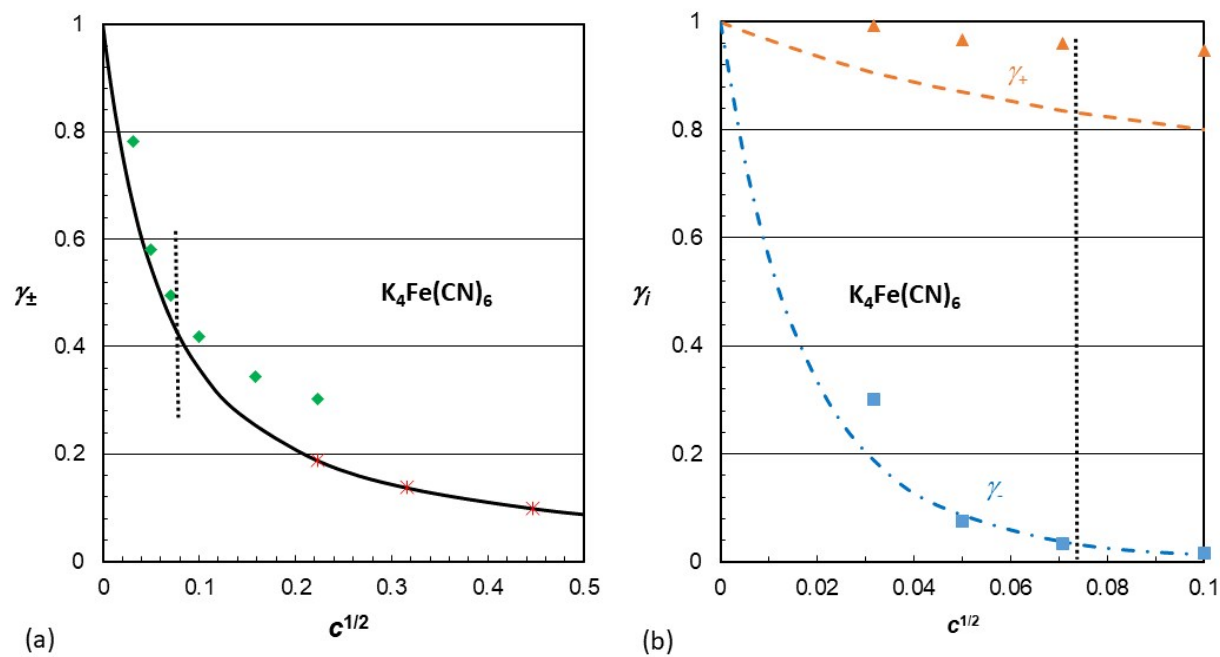

Fig. S6 As Fig. S5, but for  $K_4Fe(CN)_6$ .
